# Supplementary material for: Enhanced thermoelectric properties of the n-type Magnéli phase WO2.90: reduced thermal conductivity through microstructure engineering
Source: Royal Society of Chemistry journal article supplement (doi:10.1039/c4ta01395f), 2014-01-01
Supplement: c4ta01395f1.pdf [file c4ta01395f1.pdf]

## SUPPORTING INFORMATION

### Enhanced thermoelectric properties of the *n*-type Magnéli phase WO<sub>2.90</sub>: Reduced thermal conductivity through microstructure engineering

Gregor Kieslich<sup>a</sup>, Ulrich Burkhardt<sup>b</sup>, Christina S. Birkel<sup>c,d</sup>, Igor Veremchuk<sup>b</sup>, Jason E. Douglas<sup>c,e</sup>, Michael W. Gaultois<sup>c,d</sup>, Ingo Lieberwirth<sup>f</sup>, Ram Seshadri<sup>c,d,e</sup>, Galen D. Stucky<sup>c,d</sup>, Yuri Grin<sup>b,\*</sup>, and Wolfgang Tremel<sup>a,\*</sup>

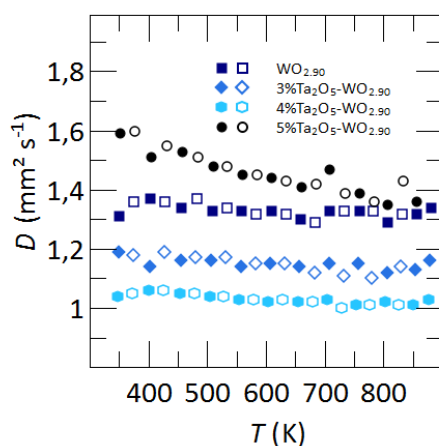

**SI-Figure 1.** Temperature dependence of the thermal diffusivities of the reference sample (black) and the samples containing Ta<sub>2</sub>O<sub>5</sub> (blue).

**SI-Table 1.** Densities of the reference sample WO<sub>2.90</sub> and the Ta<sub>2</sub>O<sub>5</sub> containing samples. Densities were obtained on polished pellets with a diameter of 20 mm using Archimedes principle. The theoretical density is 7.17 g cm<sup>-3</sup>, (Ref. 43). For the calculation of the thermal conductivity, a relative density of 97% was assumed for all samples.

| Sample                                               | Absolute density (g cm <sup>-3</sup> ) | Relative density |
|------------------------------------------------------|----------------------------------------|------------------|
| WO <sub>2.90</sub> (reference)                       | 6.7                                    | 96%              |
| 3%Ta <sub>2</sub> O <sub>5</sub> -WO <sub>2.90</sub> | 7.0                                    | 98%              |
| 4%Ta <sub>2</sub> O <sub>5</sub> -WO <sub>2.90</sub> | 7.0                                    | 98%              |
| 5%Ta <sub>2</sub> O <sub>5</sub> -WO <sub>2.90</sub> | 6.7                                    | 96%              |
